# Supplementary material for: Contribution of Heptose Metabolites and the cag Pathogenicity Island to the Activation of Monocytes/Macrophages by Helicobacter pylori
Source: PubMed Central journal article supplement (PMC8174060; doi:10.3389/fimmu.2021.632154), 2021-05-19
Supplement: Presentation_1.pdf [file Presentation_1.pdf]

# Supplementary Information

## Supplementary Figures

**Contribution of heptose metabolites and the *cag* Pathogenicity  
Island to the activation of monocytes/macrophages by  
*Helicobacter pylori***

**L. Faass, S.C. Stein, M. Hauke, M. Gapp, M. Albanese & C. Josenhans**

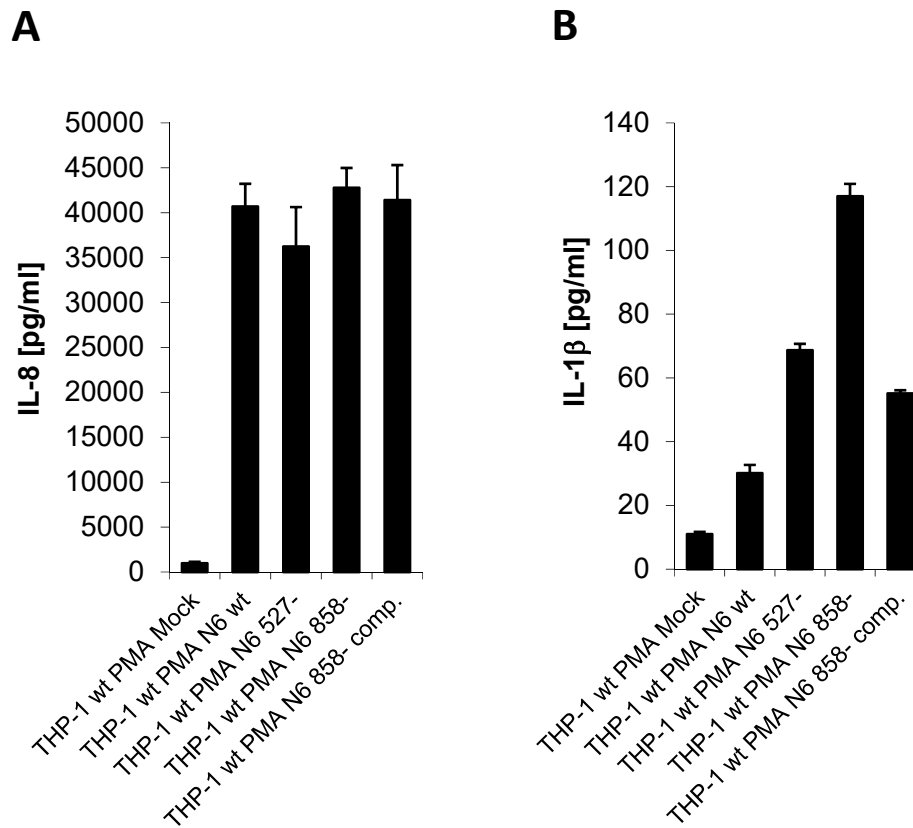

**Fig. S1: heptose biosynthesis and the CagT4SS have no direct role in the capacity of live *H. pylori* to induce IL-8 or IL-1 $\beta$  secretion by PMA-preactivated human monocyte/macrophage cell Thp-1.** Thp-1 cells which were primed and pre-activated by PMA (see methods), and only afterwards co-incubated with live *H. pylori* (post co-incubation for 4 h). Cytokines in the cell supernatants were quantitated by ELISA **A**) IL-8 secretion; **B**) IL-1 $\beta$  secretion. MOI was set at 25 bacteria per cell. In addition to parental wild type bacteria of strain N6, *cagY* (527-, T4SS functionally deficient), *hldE* (858-, core heptose biosynthesis-deficient), and *hldE*-complemented bacteria (858- comp.) were tested.

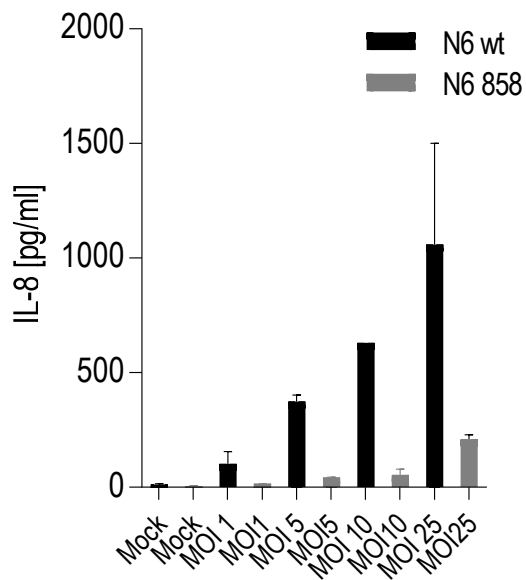

**Fig. S2: cell activation in monocyte-like Thp-1 cells upon co-incubation with live *H. pylori* bacteria are influenced by bacterial MOI.** Thp-1 cells were co-incubated with *H. pylori* N6 wild type N6 bacteria or isogenic *hldE* mutant bacteria at different MOIs; 20 h post-co-incubation, IL-8 cytokine secretion into the supernatants was determined by ELISA.

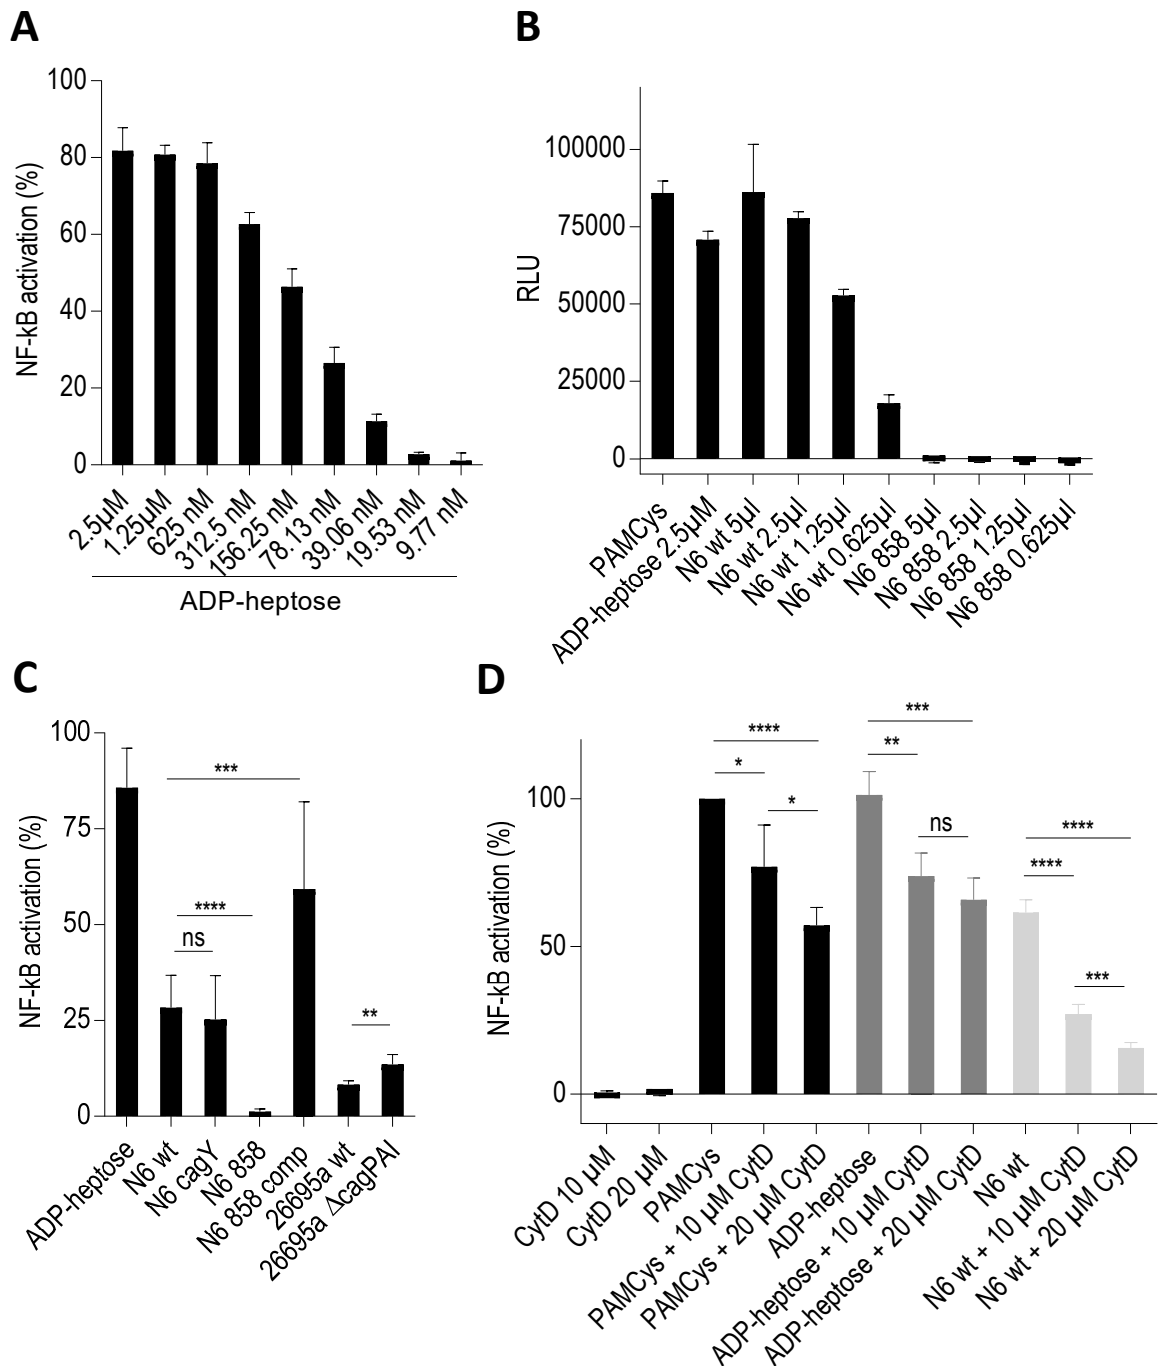

**Fig. S3: Characteristics of NF-κB activation in Thp-1 cells by pure ADP-heptose, *H. pylori* enzyme-treated lysates (ETL) or bacterial culture supernatants. A)** concentration-dependent activation of NF-κB in Thp1\_luc reporter cells by pure ADP-heptose. ADP-heptose was co-incubated with the cells at 5 μM for 4 h. For each concentration, NF-κB activation in %, relative to a PAMCys control (PAMCys) which was set to 100%, is depicted. **B)** Metabolite-enriched ETLs generated from *H. pylori* N6 wild type strain and its isogenic *hldE* mutant (at different volumes as indicated, 96 well plates) were applied to Thp1\_luc reporter cells for 4 h. Arbitrary luminescence units (RLU) are shown for each condition. **C)** Culture supernatants generated from liquid cultures of two different *H. pylori* strains as indicated and respective isogenic mutants in the *cagPAI* or heptose biosynthesis (*hldE*-, 858), (20 μl of supernatants per well in 96-well plates) were co-incubated with Thp1\_luc reporter cells for 4 h (for strain descriptions see Table 1). Quantitation of luciferase activity is shown for each condition in percent of the positive control PAMCys (20 ng/50 μl), which was set to 100%. **D)** role of cytochalasin D (cytoskeleton inhibitor) in activation of Thp-1 cells (NF-κB) by pure ADP-heptose and live *H. pylori* bacteria. Thp1\_luc reporter cells were co-incubated with pure ADP-heptose or live bacteria (strain N6, MOI of 5 bacteria per cell) for 4 h, in the presence or absence of the cytoskeleton inhibitor cytochalasin D (CytD). All values in D) are depicted in % of the positive reference (PAMCys, 100%). Statistical differences in C) and D) were calculated by unpaired student's *t*-test. Significant p values: \*\*\*\*p < 0.0001; \*\*\*p < 0.001; \*\*p < 0.01; \*p < 0.05; ns is non significant. Mock values (very low) were subtracted as background in all assays from A) through D) and are therefore not depicted.

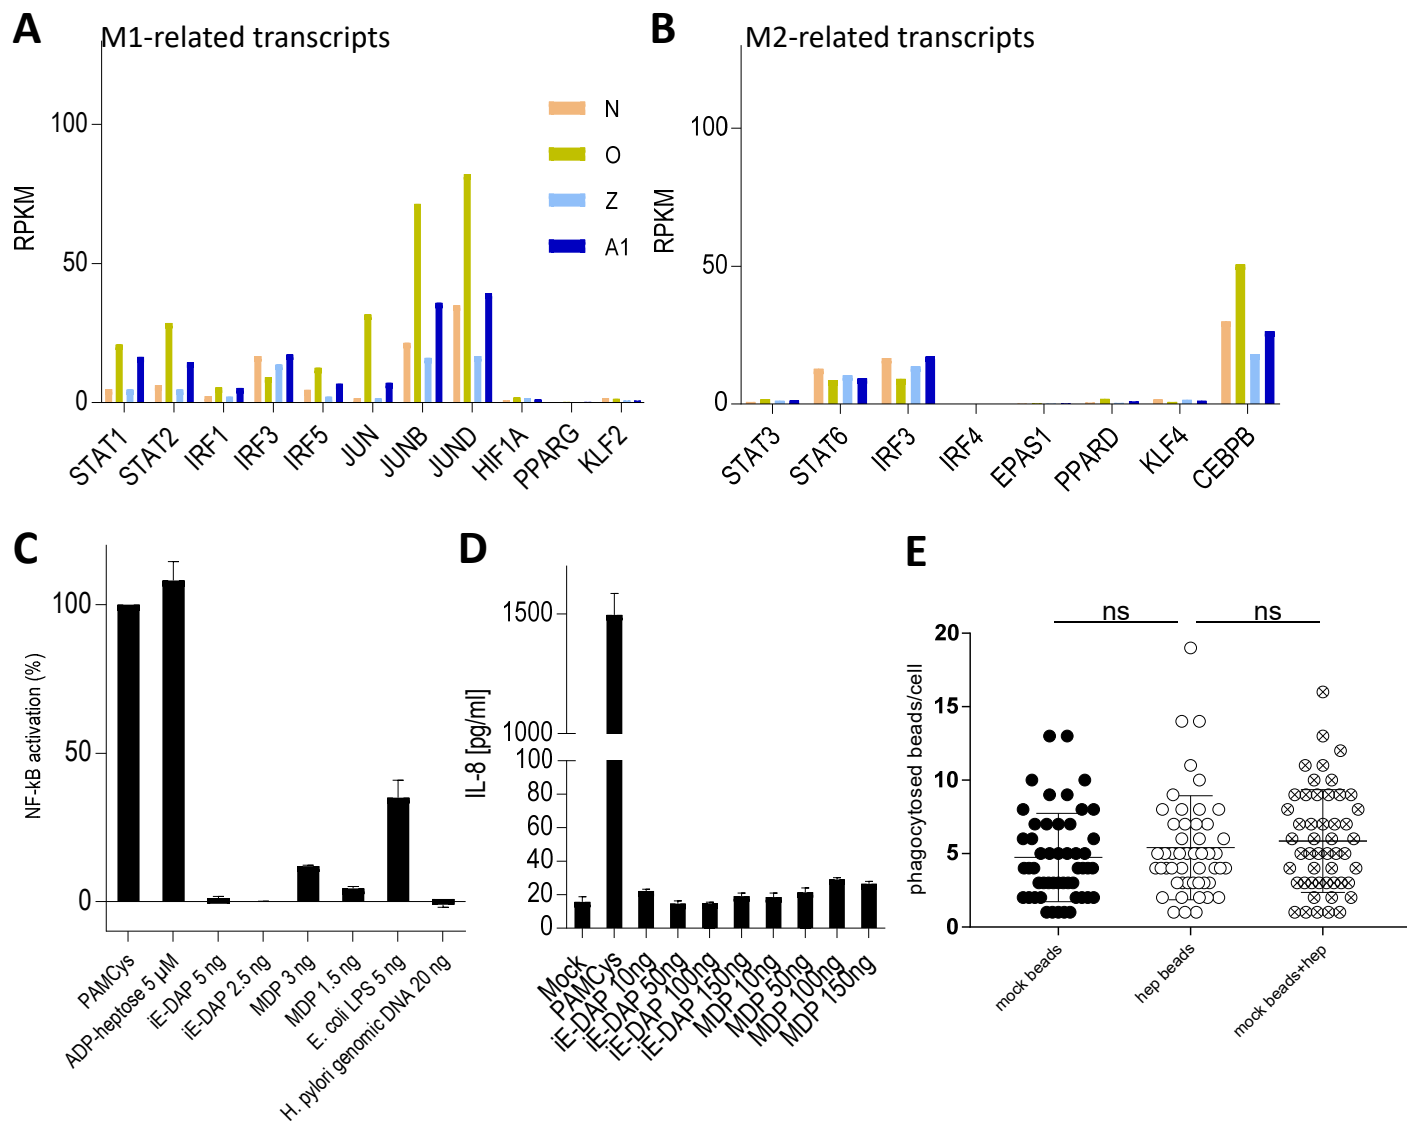

**Fig. S4: Selected transcriptome results of Thp-1 cells for macrophage phenotype and contribution of various pattern recognition receptors and their ligands to Thp-1 activation and phagocytosis.** assessing the presence and differential expression of transcripts involved in macrophage polarization. In panels **A**) and **B**), we assessed subpanels of transcripts (RPKM) involved in M1 (panel **A**) or M2 (panel **B**) macrophage polarization for differential expression in our comprehensive transcriptome datasets. N, O, Z, A1 designate mock1, *H. pylori* N6 wild type, mock2 and pure ADP-heptose co-incubation conditions with Thp-1 cells, respectively. Compare also Table 3. main Figure 3, and supplementary tables for transcriptome results. Detailed methods for transcriptome results and analyses can be found in the Methods' description. **C**) and **D**) testing for the activity of NOD1, NOD2, TLR4 and TLR9 ligands in comparison with PAMCys (positive control for activation) and ADP-heptose for NF-κB activation (**C**) or IL-8 secretion (**D**) in Thp-1 cells. In **C**), relative luminescence in % of the PAMCys control is depicted for NF-κB-dependent luciferase activation of Thp1\_luc reporter cells (96 well, co-incubation for 4 h) are shown; mock values were subtracted as background). In **D**), IL-8 secretion into the supernatants of co-incubated Thp-1 cells (20 h p.c.) was quantitated by ELISA. PAMCys was applied in **C**), and **D**) as a control condition for NF-κB activation. **E**) phagocytosis by Thp-1 cells, co-incubated with fluorescent microbeads (1 μm diameter, 4x10<sup>6</sup> beads/well in 24 well plate – 20 beads per cell) in the absence or presence of the MAMP ADP-heptose (at 2.5 μM). Ingested beads per cell were counted in fluorescence microscopy. Mock beads: Thp-1 cells co-incubated with beads for 4 h in the absence of innate stimulus; hep beads: Thp-1 pre-incubated with pure ADP-heptose for 16 h, then microbeads were added and co-incubated for another 4 h; mock beads+hep: Thp-1 cells were co-incubated with microbeads and ADP-heptose for 4 h. 50 cells were counted for each condition. Pairwise and multiple comparisons of statistically significant differences in bead uptake (shown on the y-axis) were performed using two-way ANOVA. ns is non significant.

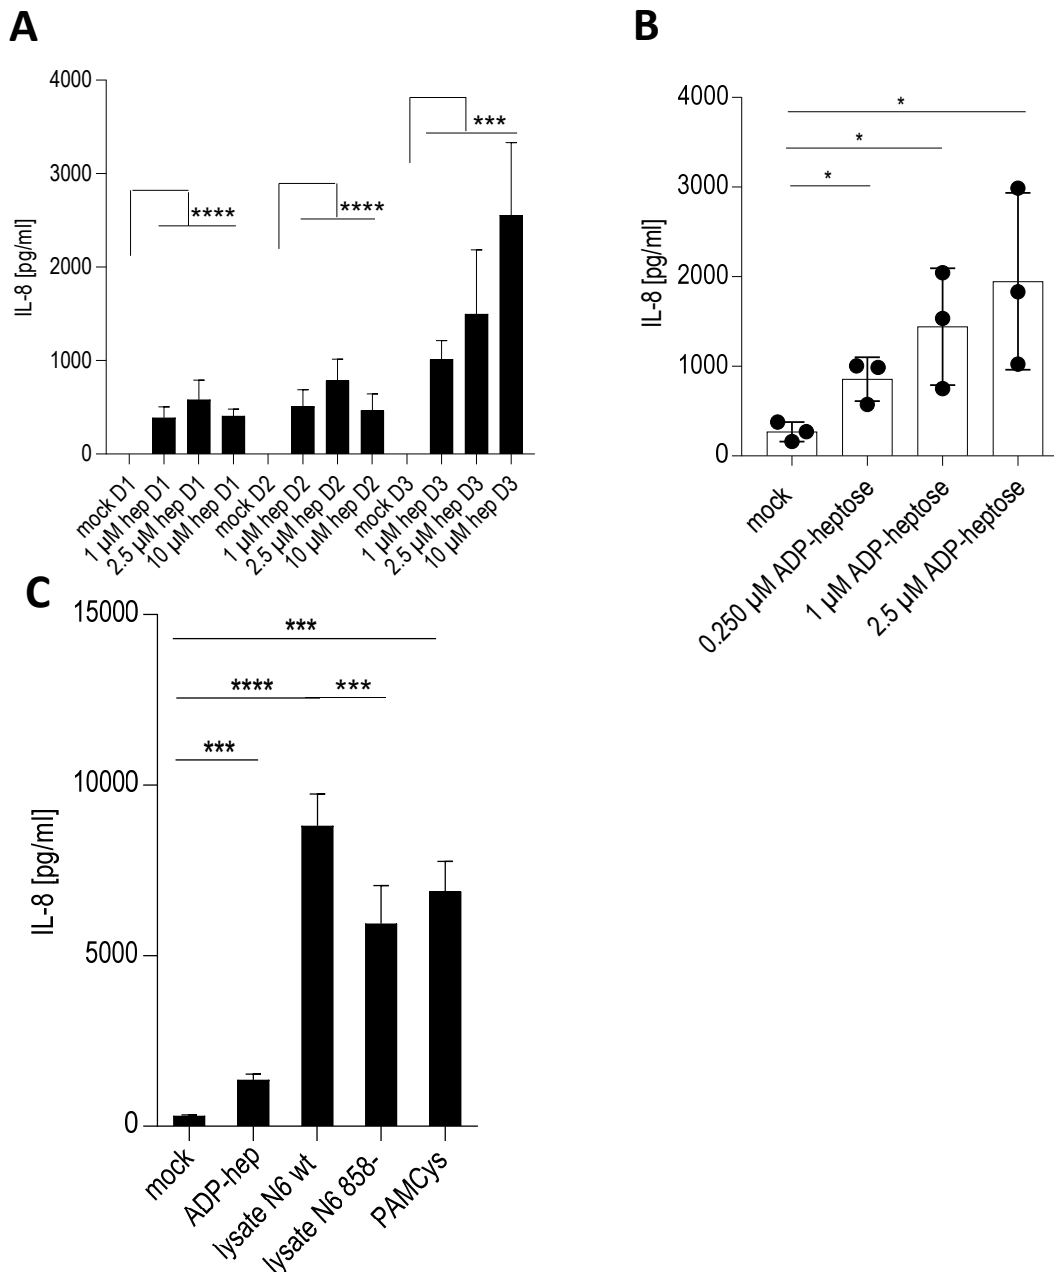

**Fig. S5: Human primary monocytes (CD14<sup>+</sup>) were tested for responses against ADP-heptose and *H. pylori* bacteria.** CD14<sup>+</sup> cells were isolated and either co-incubated directly with ADP-heptose (hep) or differentiated to hMDMs, subsequently co-incubated with ADP-heptose or *H. pylori* enzyme-treated lysates **A**) Response of non-differentiated CD14<sup>+</sup> human primary monocytes ( $2 \times 10^5$  cells/well in 24-well plate) from blood PBMC after exposure to pure ADP-heptose (hep) at indicated concentrations, for 20 h. CD14<sup>+</sup> monocytes from three independent individual healthy donors (D1, D2, D3) were investigated. **B**) Concentration-dependent activation of differentiated CD14<sup>+</sup> human primary monocyte-derived macrophages ( $2 \times 10^5$  cells/well in 24-well plate) from three independent donors by pure ADP-heptose; All donors are combined in one bar for each condition; mean and standard error for the independent donors are shown for each condition. Despite some between-donor variation (see black ball-shaped symbols), the concentration-dependent activation is clearly visible and significant. **C**) Response of differentiated primary monocyte-derived macrophages (one donor) towards ADP-heptose (ADP-hep, 2.5  $\mu$ M) or bacterial treated lysates enriched in small metabolites (50  $\mu$ l pf ETL per ml cell medium in 24 well plates; co-incubation time 4 h). N6 is wild type of *H. pylori* strain N6; 858- is the isogenic *hldE* mutant of strain N6. PAMCys (400 ng/ml) was used as a positive control condition for cell activation. IL-8 secretion into the cell supernatants in **A**), **B**) and **C**) was quantitated by ELISA. Statistically significant differences between mock- and ADP-heptose- or bacteria-co-incubated cells were calculated using two-way ANOVA and are annotated as significant differences to the mock condition (in **A** and **B**) or differences between different co-incubation conditions in **C**); \*\*\* $p < 0.001$ , \*\*\*\* $p < 0.0001$ .

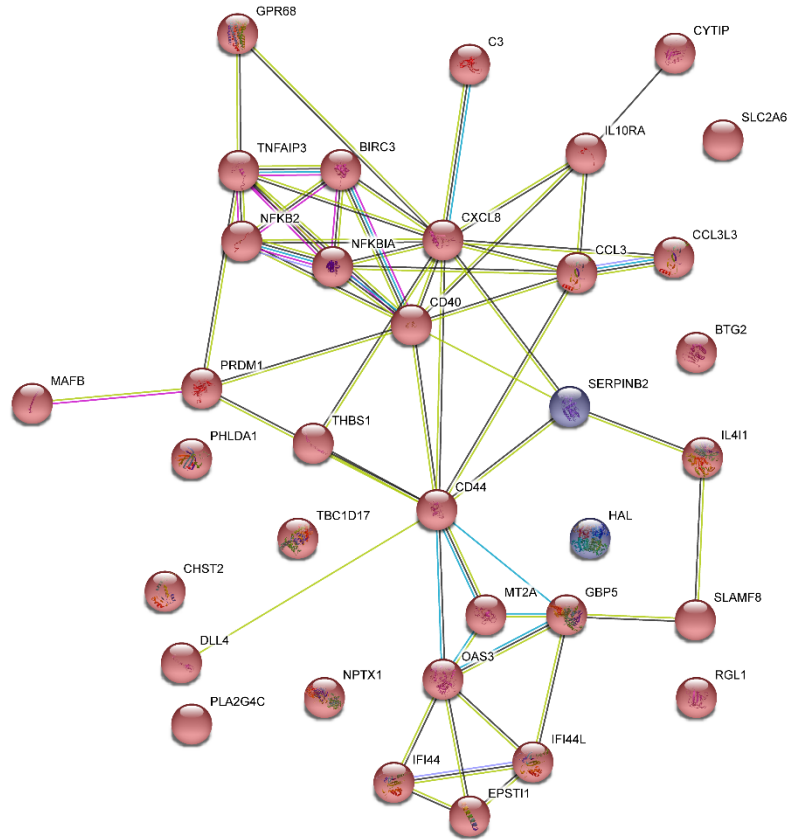

**Fig. S6: Results of transcriptome sequencing: pathway analysis and visualization by STRING of transcripts differentially regulated in Thp-1 cells co-incubated with *H. pylori* N6 wild type bacteria or with isogenic *hldE* mutant bacteria.** Comprehensive transcriptomes generated from mock-co-incubated and bacteria-co-incubated Thp-1 cells were compared with each other for differential transcript regulation. Subsequently the overlap of differential transcript regulation between wild type bacteria vs. mock (control condition) and *hldE*-mutant bacteria versus mock, respectively, was determined (see Venn digram in main Fig. 3), and the genes in the intersection of both RNA-seq pairings were analyzed by STRING (stringent cut-off of 8-fold regulated). Commonly upregulated transcripts by the two conditions are shown colored in red, commonly downregulated transcripts are colored in blue. Upregulated genes show a substantial overlap between paired conditions. Some central nodes of activation correspond to main Fig. 3 panel O (STRING diagram), shown for cell incubation with pure heptose versus mock-co-incubated and related to NF- $\kappa$ B activation. Full results are contained in Supplementary Table S2.
